# Supplementary material
Source: publisher figshare collection journal article supplement (https://gsajournals.figshare.com/ndownloader/files/18736352)
Supplement: Supplementary file 1 [file 18736352]

## Sheet: All Genes
ABCD3
ABI1
ACAD11
ACAD9
ACADSB
ACTA2
ACTR3
ACVR2A
ADAL
ADAM12
ADD1
ADD3
ADGRG6
ADGRL2
ADH1C
ADK
ADSS
AGA
AGR3
AHR
AHRR
AKR1D1
AKTIP
ALCAM
ALDH1A3
ALKBH3
AMN
AMPH
ANAPC10
ANK3
ANKRD22
APCDD1
API5
APOOL
APP
ARC
ARFIP1
ARHGAP15
ARHGAP29
ARHGAP8
ARHGDIB
ARHGEF3
ARID5B
ARL5B
ARL6
ARL6IP1
ARL8BL
ARSH
ASCC3
ATF7IP
ATG3
ATG5
ATG7
ATP1B1
ATP1B3
ATP23
ATP6AP1
ATP6V1B2
ATRIP
ATXN3
AvBD14
AvBD6
AVPR1A
BAG1
BAP1
BASP1
BCHE
BFSP2
BKJ
BLOC1S5
BMP3
BMP4
BMPER
BORA
BRINP1
BRSK2
BTBD9
BTD
C12orf75
C1GALT1
C1H2ORF49
C1orf158
C2H8ORF22
C3AR1
C3H6orf120
C5H11orf74
C7orf73
CACNA2D1
CACNB4
CAMK2D
CAT
CCDC18
CCDC6
CCDC93
CCK
CCKAR
CCNC
CCND2
CCSER2
CCT5
CD200
CD47
CD7
CD8A
CD8B
CDC14A
CDC73
CDCA7L
CDH10
CDH11
CDH2
CDH20
CDH4
CDH6
CDH8
CDK1
CDKN3
CDX2
CEBPZ
CENPP
CENPQ
CEPT1
CETN2
CG-16
CH25H
CHD7
CHID1
CHMP2B
CHORDC1
CHPT1
CHRM3
CHRNA7
CHUK
CISD1
CITED2
CL2
CLASP2
CLEC3A
CNDP2
CNTN1
CNTN5
CNTNAP5
COL12A1
COL1A2
COL22A1
COL5A1
COLEC11
COPS5
COQ7
COX6C
COX7A2L
CPA6
CPNE8
CREBL2
CRHR2
CRIM1
CRISPLD1
CRTAP
CSRP2
CTDSPL
CTNNA3
CTNNB1
CTRC
CTTN
CXCR4
CYP46A1
CYR61
DACH1
DACH2
DAP
DARS
DBT
DBX2
DCLRE1A
DCUN1D1
DDX1
DENND6A
DEPDC6
DERL1
DESI2
DGCR6L
DIAPH2
DIO2
DIO3
DLK1
DMD
DNAJB12
DNAJB14
DNAJC24
DNM1L
DNTT
DPYS
DPYSL4
DR1
DROSHA
DUPD1
DUSP6
ECHDC1
ECHDC3
EEF2KMT
EFL1
EFNB2
EGFL6
EIF2A
EIF3H
EIF5
ELAVL4
ELF1
ELMO1
ELMOD2
ELP3
EMC1
ENS-1
ENTPD1
ENTPD2
EOMES
EPB42
EPGN
EPHA3
EPM2A
EPN2
EPYC
ESRRG
ETFA
ETV1
ETV6
EVL
EXOC3
EXOC4
FAM126A
FAM129A
FAM206A
FAM214A
FAM26E
FAM46A
FAS
FBLN5
FBXO9
FGF14
FGF3
FGF7
FGFR3
FHIT
FHL5
FKBP1B
FMN1
FNDC4
FOXG1
FOXL2
FRZB
FSHR
FTO
FUBP1
FUT11
FYN
FZD4
GABRA1
GABRB3
GABRG2
GALNT1
GAPDH
GARS
GATA3
GATA6
GATAD1
GBP
GFRA1
GFRA4
GHITM
GINM1
GIT1
GJA1
GK5
GLCCI1
GLP1R
GLRX3
GNAI1
GNAL
GNAT3
GNG11
GPAT3
GPER1
GPM6A
GPR137B
GPR146
GPR37
GRB10
GRIA1
GRIA4
GSTAL3
GSTO1
GTF2A1
GTF3A
GTPBP4
H2AFZ
HABP2
HACL1
HAS2
HBZ
HCRTR2
HDAC11
HDAC2
HDAC3
HESX1
HGF
HIKESHI
HJURP
HMBOX1
HMGB1
HMGB2
HMX3
HNMT
HOXA2
HPCAL1
HPGD
HS6ST1
HSD3B1
HSPA13
HSPA4L
HTR2A
HYDIN
IAPP
ID2
IGF1
IGF2R
IKZF1
IL15
IL16
IL5RA
IL7
IMPG2
ING4
INHBA
INHBB
INO80
INSIG1
INSIG2
INTS2
ITGA9
ITGB1
ITM2C
JAZF1
KCNIP4
KCNJ3
KCNJ8
KCNMB4
KERA
KIAA1143
KIF11
KITLG
KLF11
KLF6
KLHL14
KRR1
KY
LAMA1
LARGE1
LCORL
LGALSL
LGI1
LMBRD1
LMO4
LOC419112
LOC421419
LOC422426
LRIG3
LRP5
LRRTM3
LSM3
LSM5
LUM
LYRM4
MAB21L2
MAGI2
MANSC1
MAP7
MAPKAPK3
MAPRE2
MARCH5
MARCKS
MARCO
MBL2
MBOAT1
MBP
MC2R
MC4R
MCEE
MCM9
MCMBP
MCPH1
MDGA1
MDH1
MDM1
ME1
MED27
MEOX2
MESDC2
METTL14
METTL22
MGP
MID1
MINA
MIR1-2
MIR128-2
MIR133A1
MIR135A1
MIR135B
MIR137
MIR1467-2
MIR147-1
MIR153-2
MIR1569-2
MIR1591
MIR1593
MIR1610
MIR1613
MIR1620
MIR1624
MIR1626
MIR1653
MIR1654-1
MIR1659
MIR1660
MIR1664
MIR1680
MIR1681
MIR1685
MIR1694
MIR1698-2
MIR1701
MIR1702
MIR1704
MIR1708
MIR1709
MIR1721
MIR1723
MIR1730
MIR1734
MIR1761
MIR1768
MIR1770
MIR1790
MIR1791
MIR1805
MIR1806
MIR1809
MIR1813-2
MIR1815
MIR202
MIR204-2
MIR205B
MIR206
MIR21
MIR302B
MIR32
MIR3524B
MIR3530
MIR383
MIR466
MIR489
MIR490
MIR551B
MIR6545
MIR6554
MIR6555
MIR6561
MIR6562
MIR6568
MIR6570
MIR6572
MIR6595
MIR6605
MIR6632
MIR6634
MIR6657
MIR6668
MIR6678
MIR6691-1
MIR6696
MIR6697
MIR6700
MIR6704
MIR6707
MIR7446
MIR7449
MIR7457
MIR7459
MIR757
MIR99A
MMACHC
MMP13
MMR1L2
MON2
MPPED2
MRAP2
MRAS
MRC1
MRE11
MRPL15
MRPL3
MRPL44
MRPS9
MSGN1
MTG1
MTIF3
MTMR14
MTPN
MTTP
MVP
MX1
MYB
MYC
MYCN
MYF5
MYH9
MYO5A
MYO6
MYOM2
MZT1
NANP
NAT10
NAV3
NDUFA4
NDUFC2
NEUROD1
NEUROG2
NFASC
NFKB1
NFKBIA
NFKBIZ
NGLY1
NKAIN2
NKX3-2
NLGN1
NLGN4L
NMUR2
NPBWR1
NPY6R
NR0B1
NRCAM
NRG4
NRN1
NRXN1
NRXN3
NSMCE2
NT5C2
NT5C3A
NTF3
NTPCR
NTS
NUBP1
NUDT5
NUDT7
NUP37
NUP50
NUP58
OLFM4
OPN4
OPN5L1
OPTN
ORC2
OSR2
OTOR
OTUD6B
P2RY6
P4HA1
PAH
PAICS
PAK5
PALMD
PAQR8
PAX9
PCDH1
PCDH10
PCDH15
PCMTD1
PCP4
PDCD10
PDCD5
PDDC1
PDGFC
PDK3
PDLIM5
PEAK1
PEX2
PFKP
PFN2
PGR
PHB2
PHF14
PHF20L1
PI15
PID1
PIGK
PITX2
PLA2G4A
PLAU
PLEKHB1
PLEKHB2
PLS1
PMS1
PNISR
PNPLA8
POLDIP3
POLR2B
POLR2L
PON2
POP4
POSTN
PPARGC1A
PPM1B
PPP1R12A
PPP1R7
PPP2R2D
PPP4R2
PPP6R3
PREP
PRKAG2
PRKD1
PRL
PRLHR
PRLHRL
PRPH2
PRPS2
PRPSAP2
PRRX1
PSMA6
PSMC1
PSMC6
PTCHD4
PTDSS2
PTHLH
PTPN6
PTPRU
PTPRZ1
PUSL1
PYROXD1
QKI
RAB18
RAB1B
RAB28
RAB32
RAB43
RAB5A
RAD52
RALYL
RAP1B
RAP1GDS1
RASA2
RBM12B
RBM48
RBP1
RBP2
RELL1
RELN
RET
RFTN2
RGL1
RGS17
RGS6
RHAG
RHOBTB1
RINT1
RIPK1
RNF7
RNH1
RNLS
ROCK1
RORA
ROS1
RPAP3
RPL15
RPL27A
RPS29
RPS3A
RPS6KA5
RPS6KB1
RSAD2
RSL24D1
RSRC2
RUNDC3B
RUNX1T1
RUNX2
RWDD3
RYR3
SALL3
SAMSN1
SATB1
SATB2
SBF2
SCAF11
SCIN
SCN9A
SDCBP
SDF4
SDR16C5
SEC61A2
SELENOK
SELENOS
SEMA3C
SEPP1L
SEPT7
SERPINE2
SERTAD2
SET
SETD3
SF3A1
SF3B5
SGMS2
SH3BP5
SH3GLB1
SHISA2
SLA
SLC10A2
SLC10A7
SLC16A7
SLC16A9
SLC17A5
SLC20A2
SLC25A26
SLC25A36
SLC26A5
SLC35A3
SLC37A3
SLC41A2
SLC6A4
SLC6A6
SLC9A9
SLIT2
SLIT3
SMAD5
SMC6
SMYD2
SNAP25
SNX10
SNX13
SNX16
SOSTDC1
SOT3A1L
SOX11
SOX14
SOX17
SOX2
SOX3
SOX4
SP5
SP8
SPACA9
SPCS3
SPOUT1
SPRY1
SPTSSB
SRI
SSB
SSTR1
SSTR5
SSU72
ST8SIA6
STAM2
STAT4
STK11
STK17B
STK3
STMN1
STMN2
STX2
SUCLA2
SULT
SULT1B1
SUPT3H
SUPT4H1
SWAP70
SYPL1
T
TACC3
TAF2
TAF5
TALDO1
TARP
TBC1D14
TBC1D15
TBCK
TBX18
TCEA1
TDRD3
TEAD1
TENM2
TENM3
TERC
TEX10
TFAP2A
TFAP2B
TFAP2D
TGFBR2
TGFBR3
TGM4
THADA
THBS2
THOC7
TIA1
TIMM44
TIMP3
TINAG
TLL1
TMC3
TMEM106B
TMEM17
TMEM18
TMEM26
TMEM30A
TMEM41B
TMEM45A
TMEM5
TMEM68
TMEM70
TMSB4X
TMX3
TNFRSF11B
TNS3
TOX
TP63
TRAIL-LIKE
TRAM1
TRIB2
TRPM8
TSC22D1
TSPAN14
TSPAN15
TSPAN3
TSPAN8
TSSC1
TTR
TWISTNB
UBA5
UBAC2
UBE2E3
UBN2
UBXN2A
UBXN2B
UCHL1
UCHL3
UCHL5
UFM1
UGT8
UNC5C
UQCRFS1
USP40
USP7
USPL1
VAX1
VIP
VIPR2
VMO1
VPS29
VPS35
VPS41
VRK1
VWF
WAPL
WASHC1
WDR1
WDR3
WDR45B
WDR5
WEE1
WNT5A
WNT5B
YIPF4
YIPF7
YME1L1
YTHDF3
ZBTB14
ZC3H14
ZC3H15
ZDHHC17
ZEB2
ZFP36L2
ZIC1
ZNF326
ZNF330
ZPBP
ZSWIM8

## Sheet: Biological Process
Analysis Type:	PANTHER Overrepresentation Test (Released 20181113)
Annotation Version and Release Date:	GO Ontology database Released 2018-12-01
Analyzed List:	upload_1 (Gallus gallus)
Reference List:	Gallus gallus (all genes in database)
Test Type:	FISHER
Correction:	BONFERRONI
Bonferroni count:	6611
GO biological process complete	Gallus gallus - REFLIST (19122)	Gene Number in Uploaded List	Expected value	upload_1 (over/under)	Fold Enrichment	P-value	Genes in Uploaded List (Only show top 30)
regulation of gonadotropin secretion (GO:0032276)	11	7	0.52	+	13.51	0.0496	INHBB INHBA PRL INHBA FOXL2 FSHR INHBB
calcium-dependent cell-cell adhesion via plasma membrane cell adhesion molecules (GO:0016339)	26	10	1.23	+	8.16	0.0187	NRCAM CDH20 CDH6 CDH11 CDH2 CDH10 CDH10 CDH8 CDH4 NLGN1
roof of mouth development (GO:0060021)	66	15	3.11	+	4.82	0.0187	ARID5B TGFBR2 GABRB3 WNT5A OSR2 INHBA TFAP2A INSIG2 INHBA PRRX1 VAX1 MEOX2 INSIG1 CHD7 SATB2
female sex differentiation (GO:0046660)	72	15	3.39	+	4.42	0.0469	ARID5B DACH2 WNT5A INHBA INHBA FOXL2 PGR DACH1 FSHR FZD4 SLIT2 FSHR SLIT3 TP63 CHD7
development of primary sexual characteristics (GO:0045137)	124	20	5.84	+	3.42	0.0477	ARID5B NR0B1 DACH2 ACVR2A WNT5A INHBA INHBA FOXL2 PGR DACH1 FSHR KITLG FZD4 SLIT2 FSHR GATA3 SLIT3 HMGB2 GATA6 CITED2
neuron projection morphogenesis (GO:0048812)	339	45	15.97	+	2.82	2.97e-05	NRN1 NRCAM DPYSL4 RELN TMEM106B STK11 FAM206A WNT5A WEE1 NTF3 CDH11 ELF1 PTPRZ1 CCKAR SEMA3C EFNB2 NTF3 ELAVL4 CTNNB1 CHRNA7 EPHA3 BRSK2 UNC5C UGT8 EPHA3 CDH4 LGI1 APP TENM2 VAX1
embryonic organ morphogenesis (GO:0048562)	251	33	11.83	+	2.79	0.00414	TGFBR2 HMX3 PITX2 BMP4 PCDH15 ZIC1 WNT5A BMP4 OSR2 BLOC1S5 IGF1 T TFAP2A MYF5 NEUROD1 RUNX2 CTNNB1 INSIG2 NKX3-2 FOXL2 HOXA2 PITX2 PRRX1 ID2 INSIG1 FRZB LRIG3 GJA1 GATA3 HESX1
plasma membrane bounded cell projection morphogenesis (GO:0120039)	343	45	16.16	+	2.78	4.1e-05	NRN1 NRCAM DPYSL4 RELN TMEM106B STK11 FAM206A WNT5A WEE1 NTF3 CDH11 ELF1 PTPRZ1 CCKAR SEMA3C EFNB2 NTF3 ELAVL4 CTNNB1 CHRNA7 EPHA3 BRSK2 UNC5C UGT8 EPHA3 CDH4 LGI1 APP TENM2 VAX1
cell projection morphogenesis (GO:0048858)	344	45	16.21	+	2.78	4.45e-05	NRN1 NRCAM DPYSL4 RELN TMEM106B STK11 FAM206A WNT5A WEE1 NTF3 CDH11 ELF1 PTPRZ1 CCKAR SEMA3C EFNB2 NTF3 ELAVL4 CTNNB1 CHRNA7 EPHA3 BRSK2 UNC5C UGT8 EPHA3 CDH4 LGI1 APP TENM2 VAX1
cell part morphogenesis (GO:0032990)	360	47	16.96	+	2.77	2.17e-05	NRN1 NRCAM DPYSL4 RELN TMEM106B STK11 FAM206A WNT5A WEE1 NTF3 CDH11 ELF1 PTPRZ1 CCKAR SEMA3C EFNB2 DNM1L NTF3 ELAVL4 CTNNB1 CHRNA7 EPHA3 BRSK2 UNC5C UGT8 EPHA3 CDH4 LGI1 APP TENM2
blood vessel morphogenesis (GO:0048514)	266	34	12.53	+	2.71	0.00502
blood vessel development (GO:0001568)	321	41	15.13	+	2.71	0.000378
vasculature development (GO:0001944)	337	42	15.88	+	2.65	0.00063
cell morphogenesis (GO:0000902)	524	65	24.69	+	2.63	1.53e-07
embryonic morphogenesis (GO:0048598)	442	54	20.83	+	2.59	1.29e-05
embryonic organ development (GO:0048568)	303	37	14.28	+	2.59	0.00542
cell morphogenesis involved in neuron differentiation (GO:0048667)	312	38	14.7	+	2.58	0.00396
cardiovascular system development (GO:0072358)	346	42	16.3	+	2.58	0.00103
cell morphogenesis involved in differentiation (GO:0000904)	402	47	18.94	+	2.48	0.000593
skeletal system development (GO:0001501)	378	43	17.81	+	2.41	0.00375
sensory organ development (GO:0007423)	406	46	19.13	+	2.4	0.00158
cellular component morphogenesis (GO:0032989)	611	69	28.79	+	2.4	2.12e-06
tube morphogenesis (GO:0035239)	433	47	20.4	+	2.3	0.00373
tissue morphogenesis (GO:0048729)	415	44	19.55	+	2.25	0.0207
cell adhesion (GO:0007155)	530	56	24.97	+	2.24	0.000878
neuron projection development (GO:0031175)	486	51	22.9	+	2.23	0.0047
biological adhesion (GO:0022610)	534	56	25.16	+	2.23	0.000996
embryo development (GO:0009790)	574	60	27.05	+	2.22	0.000337
regulation of cytoskeleton organization (GO:0051493)	403	42	18.99	+	2.21	0.0467
positive regulation of cell differentiation (GO:0045597)	588	61	27.71	+	2.2	0.000425
tube development (GO:0035295)	579	60	27.28	+	2.2	0.000588
regulation of MAPK cascade (GO:0043408)	492	50	23.18	+	2.16	0.0101
anatomical structure morphogenesis (GO:0009653)	1506	153	70.96	+	2.16	3.39e-14
neuron development (GO:0048666)	601	61	28.32	+	2.15	0.000679
neuron differentiation (GO:0030182)	743	75	35.01	+	2.14	2.86e-05
head development (GO:0060322)	470	47	22.15	+	2.12	0.0307
anatomical structure formation involved in morphogenesis (GO:0048646)	611	60	28.79	+	2.08	0.00358
positive regulation of transcription by RNA polymerase II (GO:0045944)	945	92	44.53	+	2.07	2.61e-06
regulation of cellular localization (GO:0060341)	535	52	25.21	+	2.06	0.0247
locomotion (GO:0040011)	785	75	36.99	+	2.03	0.000303
animal organ morphogenesis (GO:0009887)	691	66	32.56	+	2.03	0.00165
cell migration (GO:0016477)	567	54	26.72	+	2.02	0.0285
positive regulation of multicellular organismal process (GO:0051240)	1043	98	49.14	+	1.99	3.89e-06
epithelium development (GO:0060429)	628	59	29.59	+	1.99	0.0135
circulatory system development (GO:0072359)	607	57	28.6	+	1.99	0.0231
positive regulation of developmental process (GO:0051094)	866	81	40.8	+	1.99	0.000198
regulation of cell differentiation (GO:0045595)	1136	105	53.53	+	1.96	1.92e-06
tissue development (GO:0009888)	1113	102	52.44	+	1.94	5.35e-06
cell development (GO:0048468)	1190	109	56.07	+	1.94	1.79e-06
regulation of anatomical structure morphogenesis (GO:0022603)	667	60	31.43	+	1.91	0.0408
positive regulation of RNA biosynthetic process (GO:1902680)	1251	110	58.95	+	1.87	1.09e-05
positive regulation of nucleic acid-templated transcription (GO:1903508)	1251	110	58.95	+	1.87	1.09e-05
regulation of cell population proliferation (GO:0042127)	965	84	45.47	+	1.85	0.00155
nervous system development (GO:0007399)	1551	135	73.08	+	1.85	2e-07
regulation of developmental process (GO:0050793)	1670	145	78.69	+	1.84	3.34e-08
regulation of multicellular organismal development (GO:2000026)	1302	113	61.35	+	1.84	1.41e-05
positive regulation of RNA metabolic process (GO:0051254)	1304	113	61.44	+	1.84	1.45e-05
regulation of multicellular organismal process (GO:0051239)	1932	167	91.03	+	1.83	7.22e-10
positive regulation of transcription, DNA-templated (GO:0045893)	1193	103	56.21	+	1.83	9.34e-05
generation of neurons (GO:0048699)	1104	95	52.02	+	1.83	0.000507
regulation of cellular component organization (GO:0051128)	1649	141	77.7	+	1.81	2.04e-07
neurogenesis (GO:0022008)	1180	100	55.6	+	1.8	0.000393
regulation of organelle organization (GO:0033043)	871	73	41.04	+	1.78	0.0376
positive regulation of signal transduction (GO:0009967)	961	80	45.28	+	1.77	0.0219
regulation of transport (GO:0051049)	1065	88	50.18	+	1.75	0.00728
positive regulation of nucleobase-containing compound metabolic process (GO:0045935)	1429	118	67.33	+	1.75	6.85e-05
positive regulation of macromolecule biosynthetic process (GO:0010557)	1405	116	66.2	+	1.75	0.000107
regulation of transcription by RNA polymerase II (GO:0006357)	1579	130	74.4	+	1.75	1.53e-05
positive regulation of gene expression (GO:0010628)	1460	120	68.79	+	1.74	6.5e-05
multicellular organism development (GO:0007275)	3077	252	144.98	+	1.74	1.46e-14
anatomical structure development (GO:0048856)	3391	277	159.78	+	1.73	1.8e-16
regulation of phosphate metabolic process (GO:0019220)	1165	95	54.89	+	1.73	0.00473
regulation of phosphorus metabolic process (GO:0051174)	1166	95	54.94	+	1.73	0.00479
cellular response to organic substance (GO:0071310)	1258	102	59.28	+	1.72	0.002
response to external stimulus (GO:0009605)	1086	88	51.17	+	1.72	0.0137
animal organ development (GO:0048513)	1938	157	91.32	+	1.72	6.76e-07
positive regulation of cell communication (GO:0010647)	1064	86	50.13	+	1.72	0.0218
positive regulation of cellular biosynthetic process (GO:0031328)	1450	117	68.32	+	1.71	0.00035
developmental process (GO:0032502)	3583	289	168.83	+	1.71	9.44e-17
positive regulation of biosynthetic process (GO:0009891)	1466	118	69.08	+	1.71	0.000289
positive regulation of signaling (GO:0023056)	1070	86	50.42	+	1.71	0.0324
cellular developmental process (GO:0048869)	2442	196	115.06	+	1.7	2.37e-09
regulation of localization (GO:0032879)	1707	137	80.43	+	1.7	2.61e-05
regulation of phosphorylation (GO:0042325)	1037	83	48.86	+	1.7	0.0482
system development (GO:0048731)	2810	224	132.4	+	1.69	5.01e-11
regulation of protein modification process (GO:0031399)	1217	95	57.34	+	1.66	0.0307
response to organic substance (GO:0010033)	1558	121	73.41	+	1.65	0.00129
cellular response to chemical stimulus (GO:0070887)	1598	124	75.3	+	1.65	0.000918
cell differentiation (GO:0030154)	2360	183	111.2	+	1.65	3.72e-07
regulation of nucleic acid-templated transcription (GO:1903506)	2404	181	113.27	+	1.6	3.97e-06
regulation of RNA biosynthetic process (GO:2001141)	2405	181	113.32	+	1.6	4.02e-06
regulation of transcription, DNA-templated (GO:0006355)	2365	177	111.44	+	1.59	1.09e-05
response to chemical (GO:0042221)	2408	179	113.46	+	1.58	1.44e-05
positive regulation of nitrogen compound metabolic process (GO:0051173)	2252	167	106.11	+	1.57	6.49e-05
positive regulation of macromolecule metabolic process (GO:0010604)	2348	173	110.63	+	1.56	4.79e-05
regulation of macromolecule biosynthetic process (GO:0010556)	2738	201	129.01	+	1.56	2.67e-06
regulation of cellular biosynthetic process (GO:0031326)	2814	206	132.59	+	1.55	1.69e-06
regulation of cellular macromolecule biosynthetic process (GO:2000112)	2665	195	125.57	+	1.55	6.14e-06
regulation of RNA metabolic process (GO:0051252)	2584	189	121.75	+	1.55	1.29e-05
regulation of nucleobase-containing compound metabolic process (GO:0019219)	2782	203	131.08	+	1.55	3.47e-06
regulation of biological quality (GO:0065008)	2715	198	127.93	+	1.55	5.96e-06
multicellular organismal process (GO:0032501)	4128	301	194.51	+	1.55	9.67e-12
regulation of biosynthetic process (GO:0009889)	2845	206	134.05	+	1.54	4.95e-06
regulation of gene expression (GO:0010468)	2973	215	140.08	+	1.53	1.67e-06
positive regulation of cellular metabolic process (GO:0031325)	2328	168	109.69	+	1.53	0.000344
regulation of signal transduction (GO:0009966)	2050	147	96.59	+	1.52	0.00415
positive regulation of metabolic process (GO:0009893)	2518	180	118.64	+	1.52	0.000223
negative regulation of macromolecule metabolic process (GO:0010605)	1767	126	83.26	+	1.51	0.0438
positive regulation of biological process (GO:0048518)	4070	288	191.77	+	1.5	2.37e-09
positive regulation of cellular process (GO:0048522)	3606	255	169.91	+	1.5	1.45e-07
negative regulation of metabolic process (GO:0009892)	1913	135	90.14	+	1.5	0.0315
regulation of cell communication (GO:0010646)	2300	162	108.37	+	1.49	0.00284
regulation of signaling (GO:0023051)	2315	163	109.08	+	1.49	0.00299
regulation of molecular function (GO:0065009)	2224	156	104.79	+	1.49	0.00743
regulation of response to stimulus (GO:0048583)	2640	184	124.39	+	1.48	0.000719
regulation of nitrogen compound metabolic process (GO:0051171)	4035	280	190.12	+	1.47	5.54e-08
negative regulation of biological process (GO:0048519)	3467	240	163.36	+	1.47	5.78e-06
regulation of cellular metabolic process (GO:0031323)	4221	289	198.89	+	1.45	1.14e-07
regulation of macromolecule metabolic process (GO:0060255)	4192	287	197.52	+	1.45	1.35e-07
negative regulation of cellular process (GO:0048523)	3149	215	148.38	+	1.45	0.000199
regulation of metabolic process (GO:0019222)	4508	306	212.41	+	1.44	4.66e-08
regulation of primary metabolic process (GO:0080090)	4125	280	194.36	+	1.44	7.34e-07
cellular component organization (GO:0016043)	4098	265	193.09	+	1.37	0.000298
regulation of cellular process (GO:0050794)	7750	501	365.17	+	1.37	4.07e-15
cellular component organization or biogenesis (GO:0071840)	4239	272	199.74	+	1.36	0.000343
regulation of biological process (GO:0050789)	8257	528	389.06	+	1.36	8.53e-16
response to stimulus (GO:0050896)	5259	335	247.8	+	1.35	5.46e-06
cellular macromolecule metabolic process (GO:0044260)	3602	226	169.72	+	1.33	0.0413
cellular response to stimulus (GO:0051716)	4338	272	204.4	+	1.33	0.00257
biological regulation (GO:0065007)	8962	560	422.28	+	1.33	1.98e-15
cellular process (GO:0009987)	11116	649	523.77	+	1.24	2.26e-13
biological_process (GO:0008150)	14320	806	674.74	+	1.19	3.25e-23
Unclassified (UNCLASSIFIED)	4802	95	226.26	-	0.42	0

## Sheet: Molecular Function
Analysis Type:	PANTHER Overrepresentation Test (Released 20181113)
Annotation Version and Release Date:	GO Ontology database Released 2018-12-01
Analyzed List:	upload_1 (Gallus gallus)
Reference List:	Gallus gallus (all genes in database)
Test Type:	FISHER
Correction:	BONFERRONI
Bonferroni count:	2202
GO molecular function complete	Gallus gallus - REFLIST (19122)	Gene Number in Uploaded List	Expected value	upload_1 (over/under)	Fold Enrichment	P-value	Genes in Uploaded List (Only show top 30)
cell adhesion molecule binding (GO:0050839)	154	25	7.26	+	3.45	0.00107	NRXN1 OLFM4 NRCAM CDH20 CDH6 CYR61 CDH11 CTNNA3 IGF1 CDH2 CDH10 POSTN CTNNB1 FBLN5 MYH9 MYH9 TENM2 CDH10 ITGB1 CDH8 CDH4 ITGB1 PTPN6 VWF TENM3
DNA-binding transcription factor activity, RNA polymerase II-specific (GO:0000981)	516	51	24.31	+	2.1	0.00576	MYC SOX2 ARID5B NFKB1 NR0B1 RORA SOX14 ELF1 TFAP2B SP8 MYF5 ZBTB14 ZIC1 OSR2 T KLF6 TFAP2A GATA6 MYF5 KLF11 SATB1 NEUROD1 SP8 MSGN1 PAX9 CEBPZ SOX11 RUNX2 SP5 NKX3-2
DNA-binding transcription factor activity (GO:0003700)	833	75	39.25	+	1.91	0.000912	MYC SOX2 ARID5B NFKB1 CREBL2 HMX3 NR0B1 TBX18 RORA SOX14 ELF1 PGR AHR TFAP2B TAF5 SP8 MYF5 ZBTB14 ZIC1 WNT5A TSC22D1 OSR2 T KLF6 TFAP2A GATA6 MYF5 KLF11 SATB1 NEUROD1
transcription regulator activity (GO:0140110)	1140	95	53.72	+	1.77	0.000579	MYC SOX2 BASP1 ARID5B NFKB1 CREBL2 HMX3 ARID5B NR0B1 SETD3 TBX18 RORA HDAC3 SOX14 ELF1 PGR AHR MED27 TFAP2B TAF5 SP8 MYF5 DDX1 ZBTB14 ZIC1 WNT5A TSC22D1 SUPT3H OSR2 T
signaling receptor binding (GO:0005102)	1069	83	50.37	+	1.65	0.0432	TGFBR2 NRXN1 FGF14 NR0B1 RELN FYN BMP4 NRG4 ACVR2A WNT5B GNAI1 VPS35 IL16 PDGFC WNT5A CYR61 BMP4 NTF3 INHBB ELF1 MESDC2 SEMA3C VIP EFNB2 IGF1 TGFBR3 INHBA RIPK1 GRB10 TRAIL-LIKE
DNA binding (GO:0003677)	1693	120	79.77	+	1.5	0.038	MYC SOX2 BASP1 ARID5B NFKB1 PMS1 HMX3 ARID5B PITX2 NR0B1 GTF2A1 TBX18 RORA RAD52 SOX14 ELF1 PGR AHR LCORL HDAC2 DNTT TFAP2B TAF5 MYF5 PDCD5 ZBTB14 ZIC1 WNT5A SUPT3H DNTT
protein binding (GO:0005515)	5249	346	247.33	+	1.4	8.29e-09	MYC ATRIP FAS MINA P4HA1 MDM1 MAPKAPK3 SLC26A5 TGFBR2 NFKB1 MARCKS NRXN1 FGF14 EVL STX2 OLFM4 GARS NRN1 NRCAM EPM2A WDR5 PMS1 MVP DUPD1 CHUK PITX2 NRCAM NR0B1 GTF2A1 SETD3
ion binding (GO:0043167)	4382	274	206.47	+	1.33	0.000941	DNAJC24 ADSS PCDH10 P4HA1 MAPKAPK3 CDK1 THBS2 SLC26A5 TGFBR2 HABP2 WDR45B ENTPD2 LARGE1 RPS6KB1 GARS RASA2 AMPH NSMCE2 PMS1 NGLY1 PSMC1 CHUK NRXN1 RELN RORA FYN CHUK HDAC3 CH25H ATP6V1B2
heterocyclic compound binding (GO:1901363)	4625	283	217.92	+	1.3	0.00342	MYC SOX2 ADSS BASP1 MAPKAPK3 ARID5B CDK1 TGFBR2 NFKB1 ENTPD2 RPS6KB1 GARS PMS1 HMX3 ARID5B PSMC1 CHUK PITX2 NR0B1 GTF2A1 TBX18 RORA FYN CHUK EIF5 ATP6V1B2 ROS1 EIF2A RAD52 SOX14
organic cyclic compound binding (GO:0097159)	4684	285	220.7	+	1.29	0.00553	MYC SOX2 ADSS BASP1 MAPKAPK3 ARID5B CDK1 TGFBR2 NFKB1 ENTPD2 RPS6KB1 GARS PMS1 HMX3 ARID5B PSMC1 CHUK PITX2 NR0B1 GTF2A1 TBX18 RORA FYN CHUK EIF5 ATP6V1B2 ROS1 EIF2A RAD52 SOX14
binding (GO:0005488)	9919	598	467.37	+	1.28	1.98e-14
molecular_function (GO:0003674)	13507	754	636.43	+	1.18	1.48e-15
Unclassified (UNCLASSIFIED)	5615	147	264.57	-	0.56	0

## Sheet: Cellular Component
Analysis Type:	PANTHER Overrepresentation Test (Released 20181113)
Annotation Version and Release Date:	GO Ontology database Released 2018-12-01
Analyzed List:	upload_1 (Gallus gallus)
Reference List:	Gallus gallus (all genes in database)
Test Type:	FISHER
Correction:	BONFERRONI
Bonferroni count:	1171
GO cellular component complete	Gallus gallus - REFLIST (19122)	Gene Number in Uploaded List	Expected value	upload_1 (over/under)	Fold Enrichment	P-value	Genes in Uploaded List (Only show top 30)
catenin complex (GO:0016342)	27	9	1.27	+	7.07	0.0267	CDH20 CDH6 CDH11 CDH2 CDH10 CTNNB1 CDH10 CDH8 CDH4
extrinsic component of plasma membrane (GO:0019897)	123	19	5.8	+	3.28	0.0244	BASP1 FYN GNAI1 CDH20 CDH6 GNG11 CDH11 CDH2 CDH10 GNAT3 CTNNB1 SERPINE2 GNAI1 GNAL CDH10 CDH8 CDH4 FYN SNAP25
cell leading edge (GO:0031252)	244	33	11.5	+	2.87	0.000413	EVL STX2 AMPH ATP6V1B2 GABRG2 FAM206A ACTR3 CTNNA3 CDH2 MYO6 MYO5A CTNNB1 CHRNA7 CXCR4 MYH9 RAB5A MYH9 MTMR14 KITLG MYO6 GABRA1 ITGB1 GIT1 ACTA2 FAM206A LMO4 ROCK1 STMN2 SWAP70 ITGB1
cell junction (GO:0030054)	569	56	26.81	+	2.09	0.0012	RBP2 EVL NRCAM PTPRU CHRM3 PTPRU CDH20 GABRG2 CDH6 ANK3 ACTR3 GABRB3 ATP23 CDH11 DMD CTNNA3 CDH2 CDH10 GRIA4 SCIN KLF11 DMD CHRNA7 ADD3 GJA1 CHRM3 CTNNB1 CHRNA7 WDR1 MYH9
plasma membrane protein complex (GO:0098797)	447	43	21.06	+	2.04	0.0389	FAS CACNA2D1 ITGA9 NRN1 ATP6AP1 ACVR2A GNAI1 CDH20 RET CDH6 GNG11 CDH11 ATP1B3 DMD IGF1 CDH2 TGFBR3 RIPK1 CDH10 GRIA4 GNAT3 CHRNA7 ATP1B1 GJA1 CTNNB1 CHRNA7 GNAI1 SDCBP GNAL CDH10
neuron projection (GO:0043005)	785	72	36.99	+	1.95	0.000368	BASP1 GARS AMPH NRCAM RELN CHRM3 MBP VPS35 PCDH15 CDC14A GABRG2 RET FAM206A ANK3 CRHR2 GABRB3 NTF3 BLOC1S5 ZC3H14 CAMK2D DMD VIP CDH2 EXOC4 KLHL14 NTF3 GNAT3 CHRNA7 MYO5A CHRM3
synapse (GO:0045202)	769	66	36.23	+	1.82	0.00925	RBP2 NRXN1 STX2 NRN1 AMPH NRCAM CHRM3 EIF2A LRRTM3 VPS35 PCDH15 GABRG2 CRHR2 GABRB3 WNT5A DARS NTF3 CDH11 RPS3A DMD PTPRZ1 EFNB2 CDH2 EXOC4 GRIA4 NTF3 NRXN3 DMD CHRNA7 GPER1
extracellular region (GO:0005576)	1437	118	67.71	+	1.74	1.83e-05	AGA THBS2 COL22A1 TGFBR2 HABP2 FGF14 STX2 OLFM4 GARS NRN1 RELN TLL1 TBC1D15 PON2 NTS BMP4 NRG4 KERA LRRTM3 WNT5B FRZB COL1A2 MMP13 CHID1 IL16 CRTAP PLAU PDGFC FNDC4 TIMP3
neuron part (GO:0097458)	1085	89	51.12	+	1.74	0.00158	BASP1 NRXN1 STX2 GARS AMPH NRCAM RELN CHRM3 MBP LRRTM3 VPS35 PCDH15 CDC14A GABRG2 RET FAM206A ANK3 CRHR2 GABRB3 NTF3 BLOC1S5 ZC3H14 CAMK2D DMD VIP EFNB2 CDH2 EXOC4 KLHL14 NTF3
extracellular region part (GO:0044421)	1166	95	54.94	+	1.73	0.000848	AGA THBS2 COL22A1 TGFBR2 HABP2 STX2 OLFM4 GARS NRN1 RELN BMP4 NRG4 LRRTM3 WNT5B FRZB COL1A2 MMP13 CHID1 IL16 CRTAP PLAU PDGFC FNDC4 TIMP3 WNT5A THBS2 CYR61 BMPER BMP4 NTF3
intrinsic component of plasma membrane (GO:0031226)	1072	85	50.51	+	1.68	0.00855
integral component of plasma membrane (GO:0005887)	1028	81	48.44	+	1.67	0.0218
extracellular space (GO:0005615)	983	77	46.32	+	1.66	0.0404
plasma membrane bounded cell projection (GO:0120025)	1282	95	60.41	+	1.57	0.0319
cell projection (GO:0042995)	1313	97	61.87	+	1.57	0.0291
cytosol (GO:0005829)	2291	167	107.95	+	1.55	3.63e-05
plasma membrane part (GO:0044459)	1908	136	89.9	+	1.51	0.00314
protein-containing complex (GO:0032991)	4382	284	206.47	+	1.38	8.54e-06
plasma membrane (GO:0005886)	3227	206	152.05	+	1.35	0.00835
cell periphery (GO:0071944)	3374	212	158.98	+	1.33	0.0149
nucleus (GO:0005634)	5190	322	244.55	+	1.32	4.21e-05
cytoplasmic part (GO:0044444)	5843	361	275.31	+	1.31	4.8e-06
cytoplasm (GO:0005737)	7525	464	354.57	+	1.31	7.13e-10
membrane-bounded organelle (GO:0043227)	8130	484	383.07	+	1.26	4.93e-08
intracellular membrane-bounded organelle (GO:0043231)	7652	451	360.55	+	1.25	3.74e-06
cell part (GO:0044464)	12479	730	587.99	+	1.24	2.23e-21
cell (GO:0005623)	12602	736	593.79	+	1.24	9.08e-22
intracellular (GO:0005622)	10680	619	503.23	+	1.23	1.56e-11
intracellular part (GO:0044424)	10680	619	503.23	+	1.23	1.56e-11
intracellular organelle (GO:0043229)	9212	523	434.06	+	1.2	8.8e-06
organelle (GO:0043226)	9454	534	445.46	+	1.2	9.04e-06
cellular_component (GO:0005575)	14926	835	703.29	+	1.19	2.89e-28
Unclassified (UNCLASSIFIED)	4196	66	197.71	-	0.33	0
